## Cardiac magnetic resonance features of left dominant arrhythmogenic cardiomyopathy: differential diagnosis with myocarditis

D. Andreini<sup>1</sup>, E. Conte<sup>1</sup>, M. Casella<sup>1</sup>, S. Mushtaq<sup>1</sup>, G. Pontone<sup>1</sup>, A. Dello Russo<sup>1</sup>, F. Nicoli<sup>1</sup>, V. Catto<sup>1</sup>, G. Vettor<sup>1</sup>, E. Sommariva<sup>1</sup>, S. Rizzo<sup>2</sup>, C. Basso<sup>2</sup>, C. Tondo<sup>1</sup>, M. Pepi<sup>1</sup>

<sup>1</sup>Cardiology Center Monzino IRCCS, Milan, Italy; <sup>2</sup>University of Padova, Department of Cardiovascular Pathology, Padua, Italy

**Funding Acknowledgement:** Type of funding source: None

**Objectives:** To identify potential imaging features at cardiac magnetic resonance (CMR) specific for left-dominant arrhythmogenic cardiomyopathy (LDAC) diagnosis.

**Materials and methods:** Between January 2011 and May 2016, we considered 36 consecutive stable patients with a recent diagnosis of significant VA and ECG morphology consistent with a LV origin, detection of potential LV arrhythmic substrate at CMR, undergoing a clinically-indicated LV endomyocardial biopsy. Exclusion criteria were history of known cardiac disease, contraindications to CMR and impaired CMR image quality. After application of these criteria, in 9 patients endomyocardial biopsy showed tissue abnormalities consistent with the diagnosis of LDAC. From the same CMR-endomyocardial biopsy registry, a second group of 9 consecutive patients with a histological diagnosis of previous myocarditis were identified.

**Results:** Mid-wall LGE in the interventricular septum was detected in 5 myocarditis, without findings in LDAC group ( $p=0.03$ ), whereas subepicardial LGE at the level of posterolateral wall of LV was detected in 8 cases of LDAC vs. 2 cases of myocarditis ( $p=0.02$ ). Fat infiltration, and particularly subepicardial posterolateral fat infiltration, was found in all LDAC patients vs. one myocarditis only ( $p<0.01$ ). No differences in other CMR findings or in any clinical or echocardiographic parameters were found between patients with a biopsy consistent with LDAC vs. patients in whom biopsy suggested myocarditis.

**Conclusions:** In patients with significant VA and ECG morphology consistent with a LV origin, identification of morpho-functional involvement of the subepicardial layer of LV posterolateral wall at CMR (LGE, fat infiltration, wall dyskinesia) is consistent with a diagnosis of LDAC.
